# Supplementary material for: Influence of Monomer Concentration on the Morphologies and Electrochemical Properties of PEDOT, PANI, and PPy Prepared from Aqueous Solution
Source: Hindawi journal article supplement (doi:10.1155/2016/8518293), 2016-01-01
Supplement: f1 [file 8518293.f1.docx]

Electronic Supplementary Information


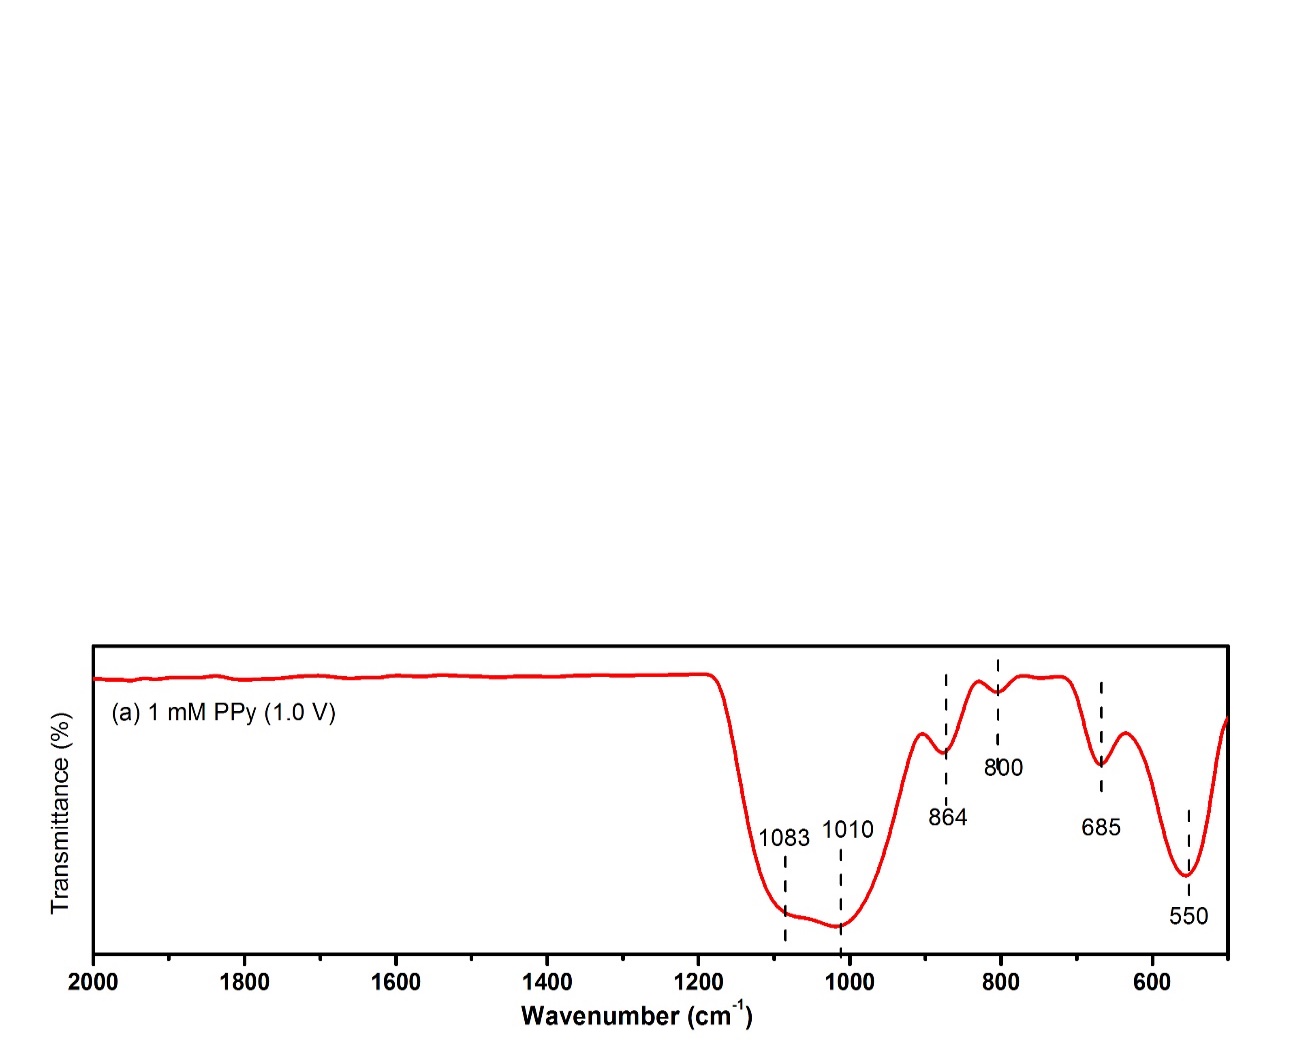
S1

Fig. S1 The FTIR-ATR spectra of PPy obtained from solution containing 1 mM monomer and 0.1 M LiClO4

S2


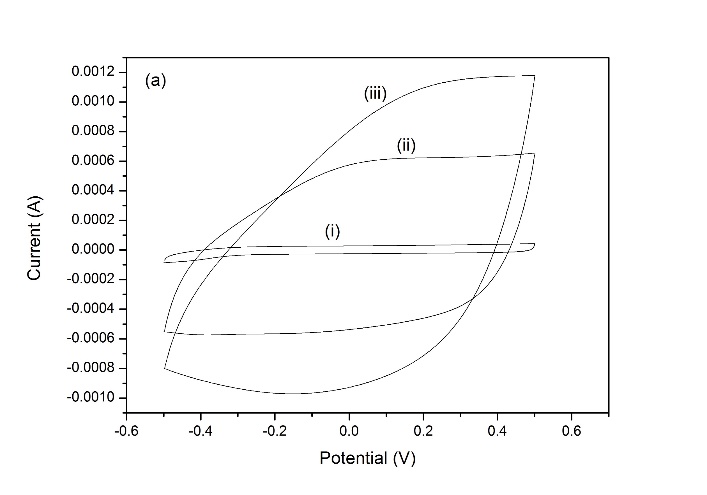

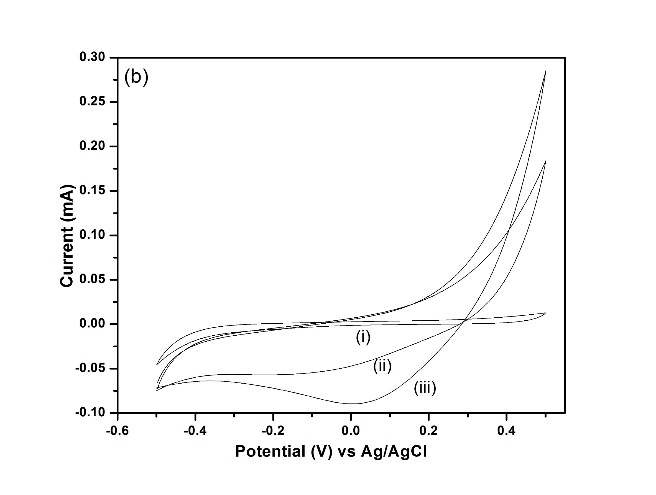

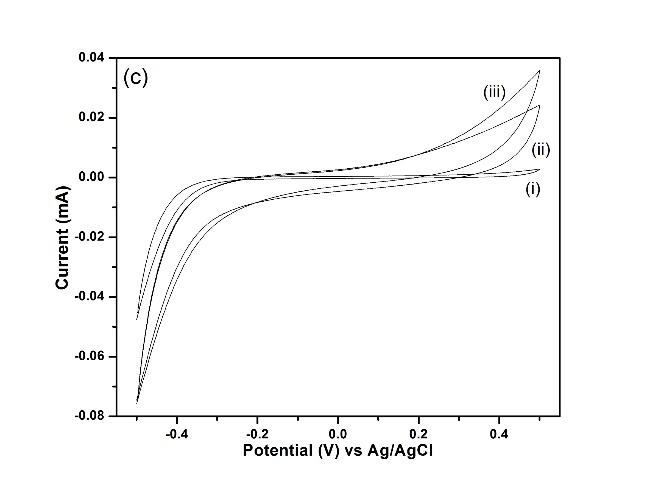


Fig. S2 The CVs for the (a) PEDOT, (b) PANI and (c) PPy films electropolymerized at 1.0 V for all monomer concentration recorded in 0.1 M potassium chloride (KCl) solution at the scan rate of 100 mV/s
